# Supplementary material for: Expression of autophagy and apoptosis-related factors in the periodontal tissue of experimental diabetic rats: a histomorphometric, microtomographic and immunohistochemical study
Source: PeerJ. 2021 Jun 9;9:e11577. doi: 10.7717/peerj.11577 (PMC8197035; doi:10.7717/peerj.11577)
Supplement: Supplemental Information 6 — Alveolar bone loss detected in M3 to M1 of each group. Data represent (mean values ± SEM) (n = 6 for each group). [file peerj-09-11577-s006.xlsx]

## Sheet: 工作表1
	N1			D1			N2			D2
M1	0.293	0.257	0.303	0.436	0.406	0.455	0.305	0.285	0.325	0.725	0.675	0.755
M2	0.252	0.213	0.274	0.512	0.496	0.563	0.261	0.231	0.282	0.813	0.787	0.852
M3	0.214	0.2098	0.245	0.348	0.315	0.362	0.221	0.201	0.261	0.583	0.551	0.612
