# Supplementary material for: Expression of autophagy and apoptosis-related factors in the periodontal tissue of experimental diabetic rats: a histomorphometric, microtomographic and immunohistochemical study
Source: PeerJ. 2021 Jun 9;9:e11577. doi: 10.7717/peerj.11577 (PMC8197035; doi:10.7717/peerj.11577)
Supplement: Supplemental Information 7 — Each value is expressed as a score of one visual field randomly selected from each section (n = 6 for each group) [file peerj-09-11577-s007.xlsx]

## Sheet: 工作表1
	N1						D1						N2						D2
LC3	1	1	2	1	1	1	3	3	3	3	3	3	1	1	2	1	1	1	0	0	0	0	0	1
	2	0	1	1	1	1	3	2	3	3	2	3	0	0	1	1	2	0	0	0	1	0	0	1
	1	1	2	2	1	2	3	3	3	3	3	3	0	0	0	0	1	0	1	1	1	0	0	0
	1	2	1	1	2	1	2	2	3	2	3	2	2	1	2	1	1	2	0	0	0	1	0	0
	2	0	2	1	2	1	3	2	2	2	2	2	2	1	1	1	1	1	1	0	0	1	1	0
median	1	1	2	1	1	1	3	2	3	3	3	3	1	1	1	1	1	1	0	0	0	0	0	0
Bax	0	0	0	0	0	1	1	1	1	1	1	1	0	0	0	0	0	0	3	3	3	3	2	3
	0	0	0	1	0	0	1	2	2	1	0	1	0	0	1	0	1	0	3	2	3	3	2	3
	0	0	0	0	0	0	0	1	2	1	0	0	1	0	1	0	0	0	3	3	3	3	3	3
	1	0	0	0	0	0	1	0	1	2	1	0	0	0	0	1	0	0	2	3	3	3	3	3
	0	0	0	1	0	0	2	0	2	1	0	2	0	0	0	0	1	1	3	3	3	3	3	3
median	0	0	0	0	0	0	1	1	2	1	0	1	0	0	0	0	0	0	3	3	3	3	3	3
Bcl-2	3	3	3	3	3	2	1	1	1	1	1	1	3	3	3	3	3	3	1	1	1	1	1	2
	3	2	3	3	3	3	2	0	1	1	2	1	3	2	2	3	2	3	1	1	2	1	0	1
	2	2	3	2	3	3	1	0	2	1	2	1	2	2	3	3	3	2	1	0	0	0	0	1
	3	3	2	3	3	3	1	1	2	2	1	0	3	3	3	3	3	2	0	2	0	2	1	0
	3	3	3	2	2	3	1	1	2	2	1	1	3	3	2	2	3	3	2	1	2	0	1	1
median	3	3	3	3	3	3	1	1	2	1	1	1	3	3	3	3	3	3	1	1	1	1	1	1
